# Supplementary material for: Sustainable synthesis of carbon dots from Ananas Comosus as renewable biomass: nanomolar level detection of glutathione
Source: Royal Society of Chemistry journal article supplement (doi:10.1039/d4su00004h), 2024-01-01
Supplement: d4su00004h1.pdf [file d4su00004h1.pdf]

1

## Supporting Information

### 2 Sustainable Synthesis of Carbon Dots from Ananas Comosus as Renewable Biomass: A 3 Nanomolar Level Detection of Glutathione

4

5 Mallika Phull, Amjad Ali, Banibrata Maity\*

6

7 School of Chemistry and Biochemistry, Thapar Institute of Engineering and Technology

8

Patiala 147004, India

9

\*Corresponding Author E-mail: [banibrata.maity@thapar.edu](mailto:banibrata.maity@thapar.edu) (Banibrata Maity)

10

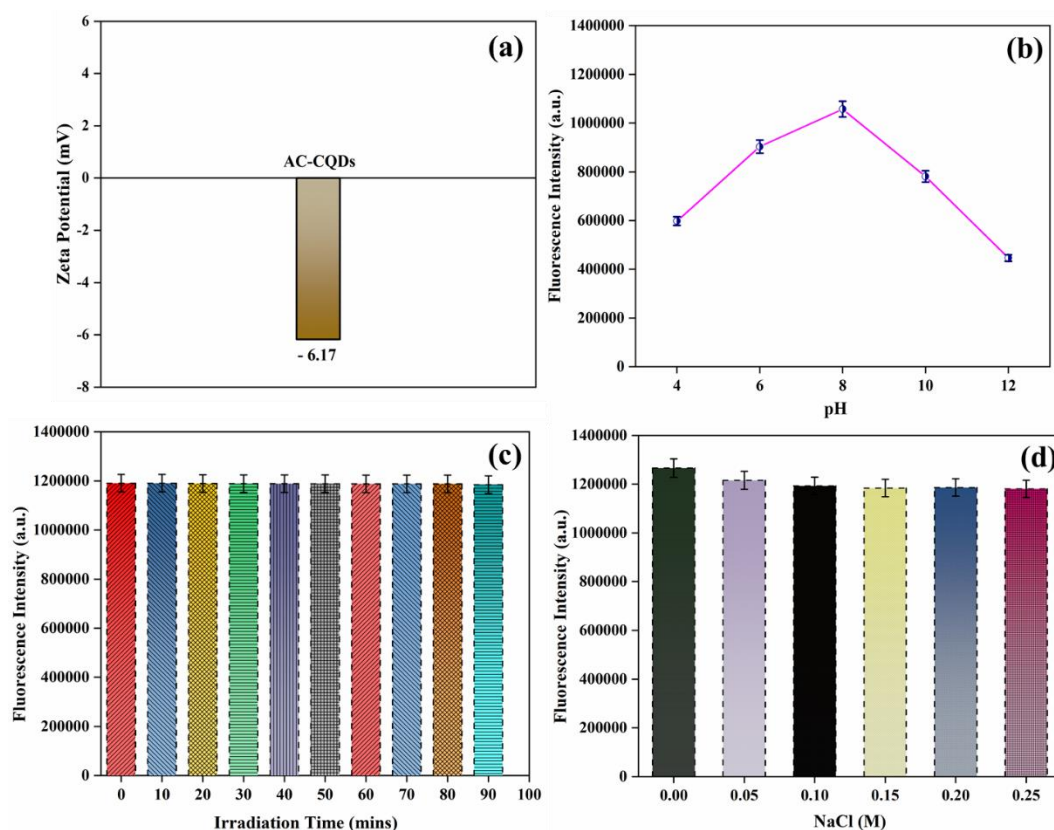

11

12 **Figure S1.** (a) Zeta potential of AC-CQDs, (b) emission spectra at different pH (4-12), (c)  
13 stability study of AC-CQDs with irradiation time, and (d) impact of ionic strength on PL  
14 intensity of AC-CQDs with different concentrations of NaCl.

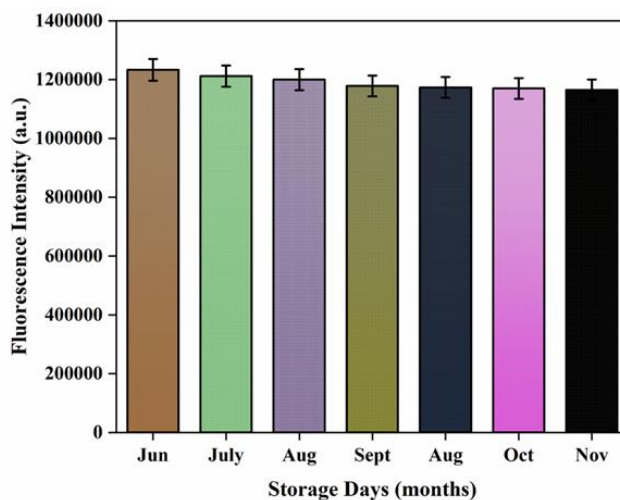

15

16 **Figure S2.** Effect of storage duration on stability of AC-CQDs

17

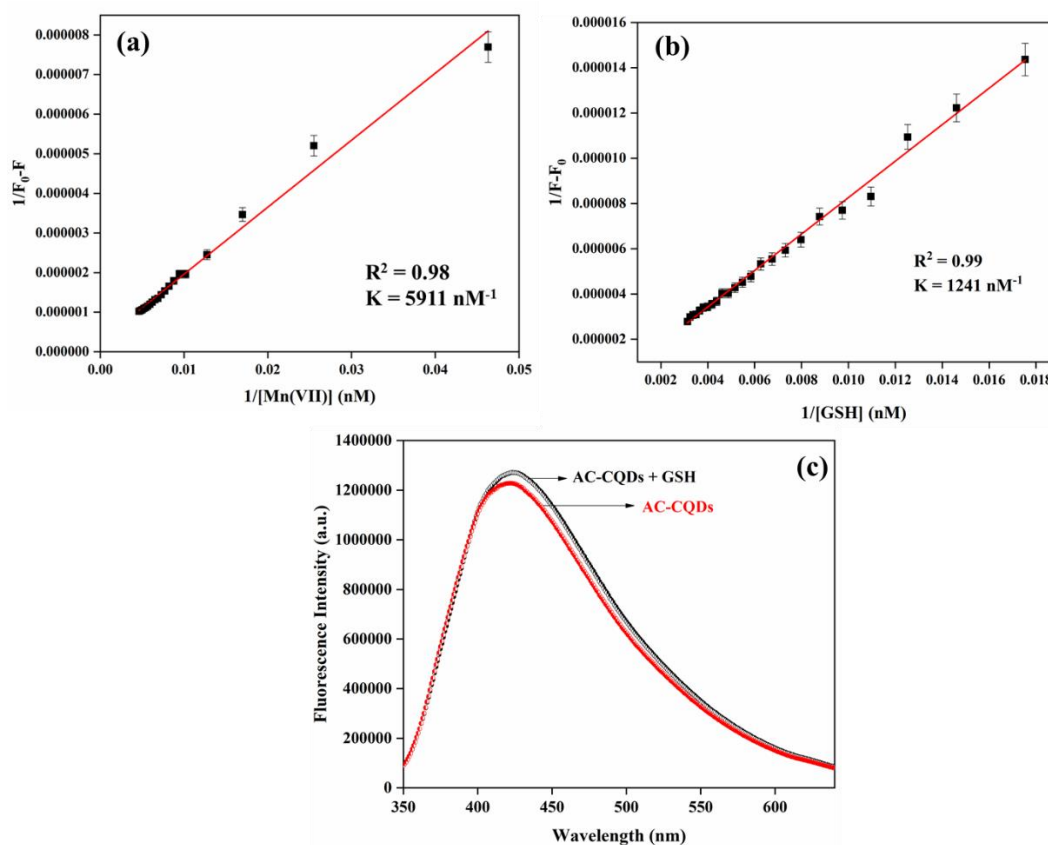

18

19 **Figure S3.** B-H binding plot of (a) AC-CQDs with Mn (VII), (b) [AC-CQDs + Mn (VII)] in  
 20 presence of GSH and (c) control experiment of PL intensity of AC-CQDs and GSH.

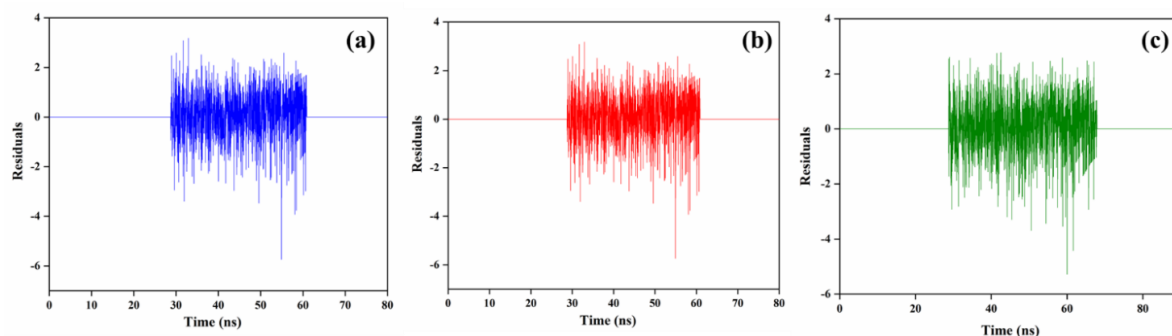

21  
22 **Figure S4.** Time-resolved emission spectral residual plots of (a) AC-CQDs, (b) [AC-CQDs +  
23 Mn (VII)] and (c) [AC-CQDs + Mn (VII)] +GSH.

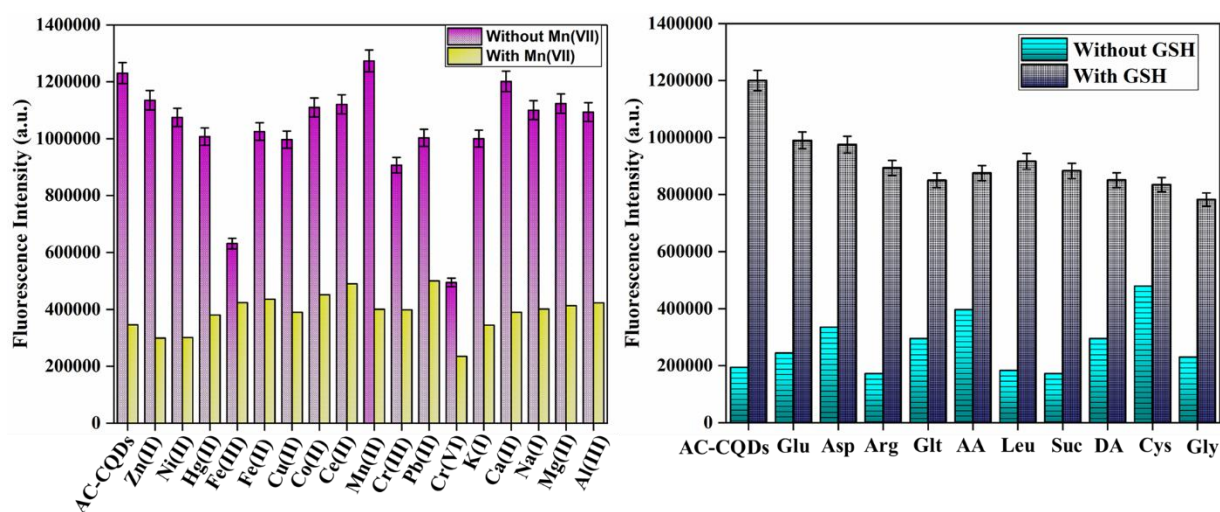

24  
25 **Figure S5.** (a) Interference study of AC-CQDs for Mn (VII) in presence of different metal  
26 ions, (b) Interference study of [AC-CQDs + Mn (VII)] for GSH in presence of different  
27 amino acids and biomolecules.

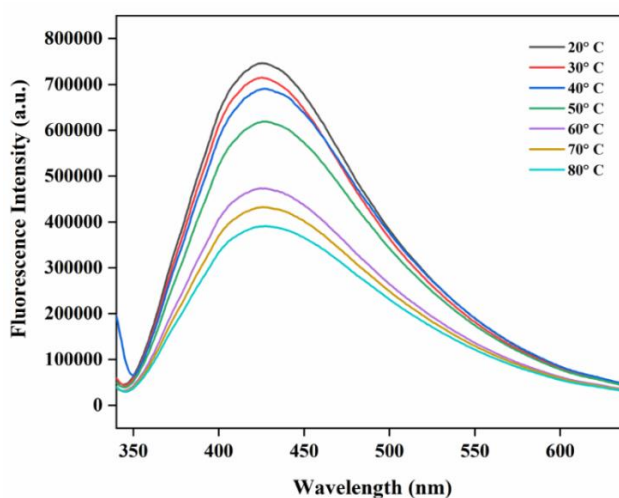

28  
29 **Figure S6.** Effect of Temperature on AC-CQDs.

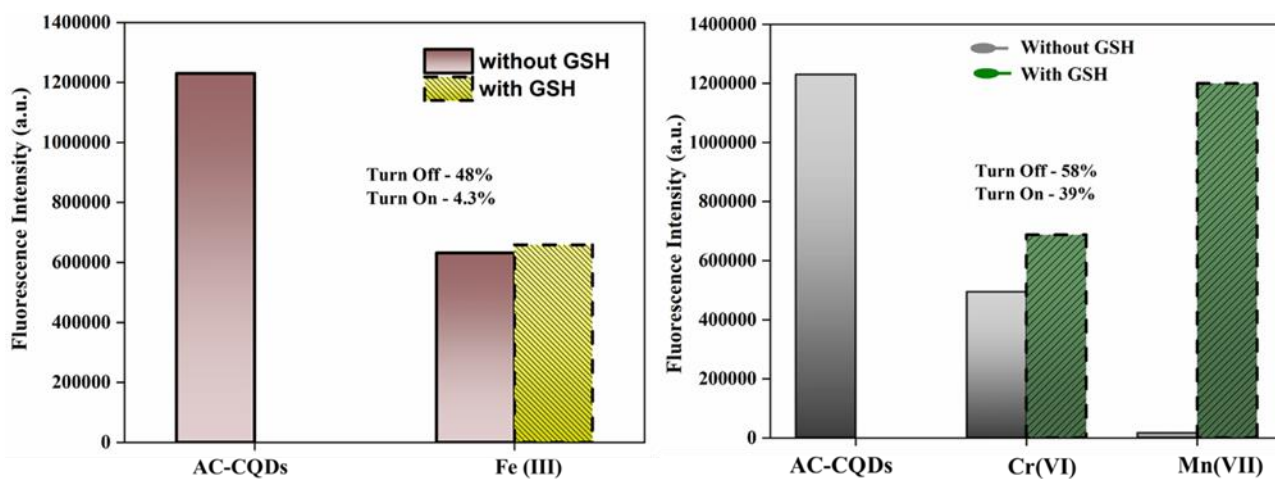

30

31 **Figure S7.** Turn-On response of Fe (III) and Cr (VI) ions towards GSH.

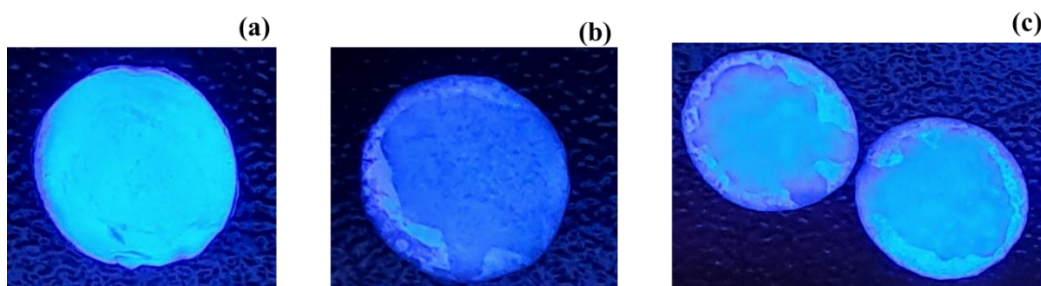

32

33 **Figure S8.** Visual depiction of Fluorescence of (a) AC-CQDs, (b) [AC-CQDs + Mn (VII)]  
 34 and (c) [AC-CQDs + Mn (VII)] + GSH.

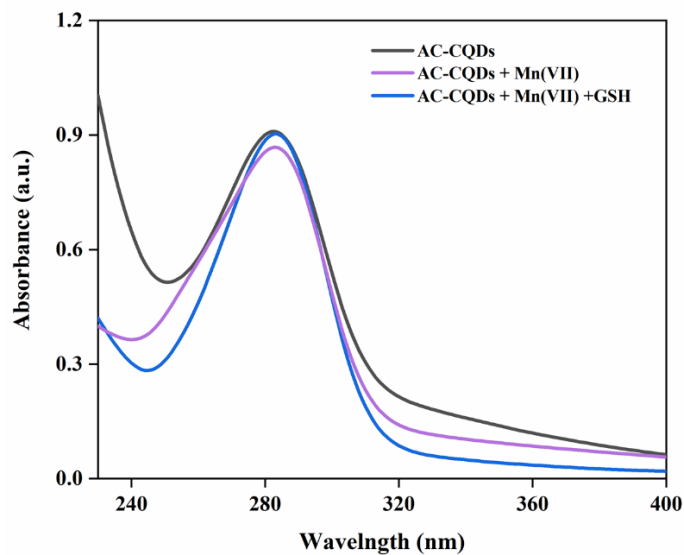

35

36 **Figure S9.** UV absorption of AC-CQDs, [AC-CQDs + Mn (VII)] and [AC-CQDs + Mn  
 37 (VII)] + GSH

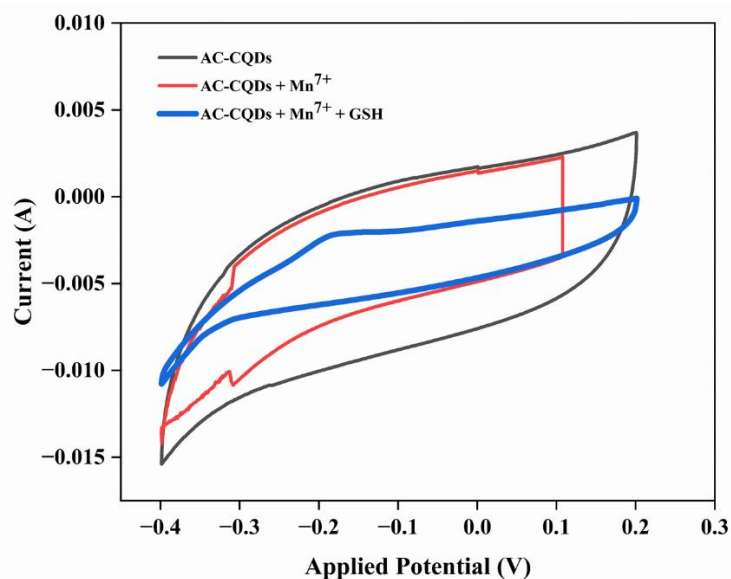

38

39 **Figure S10.** Cyclic voltammogram of AC-CQDs, AC-CQDs@Mn<sup>7+</sup> and AC-  
40 CQDs@Mn<sup>7+</sup>]GSH

41

42 **Table S1.** Time-resolved emission lifetime parameters of AC-CQDs with Mn (VII) ions and  
43 GSH.

| System                     | $\tau_1$<br>(ns) | $\tau_2$<br>(ns) | $\tau_3$ (ns) | $a_1$ | $a_2$ | $a_3$ | $\tau_{avg}^*$<br>(ns) | $\chi^2$ | DW <sup>#</sup> |
|----------------------------|------------------|------------------|---------------|-------|-------|-------|------------------------|----------|-----------------|
| AC-CQDs                    | 0.84             | 2.52             | 8.63          | 0.22  | 0.31  | 0.46  | 4.93                   | 1.11     | 1.90            |
| AC-CQDs + Mn<br>(VII)      | 0.56             | 2.24             | 6.45          | 0.19  | 0.37  | 0.42  | 3.64                   | 1.06     | 1.98            |
| AC-CQDs + Mn<br>(VII)+ GSH | 0.66             | 2.25             | 7.96          | 0.17  | 0.37  | 0.45  | 4.53                   | 1.08     | 1.90            |

44  $\tau_{avg}^*$  (ns) =  $\tau_1 a_1 + \tau_2 a_2 + \tau_3 a_3$ , Error:  $\pm 5\%$ , # D.W. = Durbin-Watson parameter

45

46

47

48

49

50 **Table S2.** Intraday and Inter day precision data for estimating Mn (VII) and GSH by the  
 51 developed sensor.

| Analytes        | Conc. taken (nM) | Intra Day <sup>a</sup> |                      | Inter Day <sup>b</sup> |                      |
|-----------------|------------------|------------------------|----------------------|------------------------|----------------------|
|                 |                  | %RSD                   | % Error <sup>c</sup> | %RSD                   | % Error <sup>c</sup> |
| <b>Mn (VII)</b> | 40               | 0.82                   | 0.47                 | 1.71                   | 0.98                 |
|                 | 80               | 0.19                   | 0.56                 | 0.98                   | 0.56                 |
|                 | 100              | 0.17                   | 0.10                 | 1.35                   | 0.78                 |
| <b>GSH</b>      | 100              | 1.83                   | 1.05                 | 1.69                   | 0.97                 |
|                 | 150              | 0.99                   | 0.57                 | 1.87                   | 1.07                 |
|                 | 200              | 0.42                   | 0.24                 | 1.20                   | 0.69                 |

52 Each result is the average of three separate determinations.

53 <sup>a</sup>Within a day

54 <sup>b</sup>Three consecutive days

55 <sup>c</sup>%Error = %RSD/ $\sqrt{n}$

56

57 **Table S3.** Utility of the developed AC-CQDs probe for detection of Mn (VII) in real  
 58 samples.

| Sample             | spiked Conc ( $\mu$ M) | found Conc ( $\mu$ M) | recovery (%) <sup>♦</sup> | RSD (%) |
|--------------------|------------------------|-----------------------|---------------------------|---------|
| <b>River Water</b> | 0.1                    | 0.097                 | 97                        | 0.42    |
|                    | 0.2                    | 0.191                 | 95.5                      | 0.70    |
|                    | 0.3                    | 0.286                 | 95.3                      | 1.50    |
| <b>Tap Water</b>   | 0.1                    | 0.096                 | 96                        | 1.38    |
|                    | 0.2                    | 0.188                 | 94                        | 1.35    |
|                    | 0.3                    | 0.271                 | 90.3                      | 2.40    |

59 <sup>♦</sup> = (Found conc/ Spiked conc) x 100
